# Supplementary material
Source: PubMed Central journal article supplement (PMC3071910)
Supplement: mmc1.pdf [file mmc1.pdf]

**Supplemental Data**  
**American Journal of Human Genetics, Volume 88**

**A Mutation in *C2orf64* Causes Impaired Cytochrome c  
Oxidase Assembly and Mitochondrial Cardiomyopathy**

**Merei Huigsloot, Leo G. Nijtmans, Radek Szklarczyk, Marieke J.H. Baars, Mariël A.M. van den Brand, Marthe G.M. HendriksFranssen, Lambertus P. van den Heuvel, Jan A.M. Smeitink, Martijn A. Huynen, and Richard J.T. Rodenburg**

**Table S1. Summary Microsatellite Marker Analysis Results**

| Chromosome | Physical position SNP (bp) | Marshfield SNP (cM) | Marker ID | Marshfield Marker (cM) | Microsatellite marker results* |     |      |     |
|------------|----------------------------|---------------------|-----------|------------------------|--------------------------------|-----|------|-----|
|            |                            |                     |           |                        | P1                             | P2  | S3   | S4  |
| 2          | 73286520                   | 90.13               |           |                        |                                |     |      |     |
| 2          |                            |                     | D2S286    | 94.05                  | 1/1                            | 1/1 | 2/1  | 2/2 |
| 2          |                            |                     | D2S2333   | 103.16                 | 2/2                            | 2/2 | 2/1  | 1/1 |
| 2          |                            |                     | D2S2216   | 111.21                 | 1/1                            | 1/1 | 3/1  | 3/2 |
| 2          |                            |                     | D2S160    | 122.96                 | 1/1                            | 1/1 | 2/1  | 2/1 |
| 2          | 113469814                  | 123.07              |           |                        |                                |     |      |     |
| 2          | 113638507                  | 123.16              |           |                        |                                |     |      |     |
| 2          |                            |                     | D2S347    | 131.51                 | 1/1                            | 1/1 | 1/1  | 1/1 |
| 2          |                            |                     | D2S112    | 141.62                 | 2/2                            | 2/2 | 2/2  | 2/1 |
| 2          | 145072714                  | 149.35              |           |                        |                                |     |      |     |
| 2          | 194047508                  | 192.32              |           |                        |                                |     |      |     |
| 2          |                            |                     | D2S117    | 194.45                 | 1/1                            | 2/1 | 1/1  | 1/1 |
| 2          |                            |                     | D2S2237   | 200.43                 | 1/1                            | 1/1 | 1/1  | 1/1 |
| 2          | 205320441                  | 200.17              |           |                        |                                |     |      |     |
| 5          | 63948565                   | 72.04               |           |                        |                                |     |      |     |
| 5          |                            |                     | D5S647    | 74.07                  | 1/1                            | 1/1 | 1/1  | 1/1 |
| 5          | 74542414                   | 77.83               |           |                        |                                |     |      |     |
| 12         | 55618203                   | 71.09               |           |                        |                                |     |      |     |
| 12         |                            |                     | D12S1644  | 72.20                  | 1/1                            | 1/1 | 1/1  | 2/1 |
| 12         | 61542477                   | 74.36               |           |                        |                                |     |      |     |
| 13         | 92351682                   | 72.09               |           |                        |                                |     |      |     |
| 13         |                            |                     | D13S1241  | 76.26                  | 3/3                            | 3/3 | 3/1  | 3/2 |
| 13         | 97815213                   | 77.91               |           |                        |                                |     |      |     |
| 14         | 53193709                   | 55.35               |           |                        |                                |     |      |     |
| 14         |                            |                     | D14S276   | 56.36                  | 2/2                            | 2/2 | 2/1  | 2/2 |
| 14         |                            |                     | D14S63    | 69.18                  | 1/1                            | 1/1 | 2/1  | 1/1 |
| 14         |                            |                     | D14S258   | 76.28                  | 1/1                            | 1/1 | 2/1  | 1/1 |
| 14         |                            |                     | D14S74    | 87.36                  | 2/2                            | 2/1 | n.d. | 3/2 |
| 14         | 84810248                   | 92.67               |           |                        |                                |     |      |     |
| 16         | 50309752                   | 65.20               |           |                        |                                |     |      |     |
| 16         |                            |                     | D16S415   | 67.62                  | 1/1                            | 1/1 | 3/1  | 2/1 |
| 16         | 53287244                   | 71.55               |           |                        |                                |     |      |     |
| 16         | 54085660                   | 73.56               |           |                        |                                |     |      |     |
| 16         |                            |                     | D16S3057  | 77.13                  | 1/1                            | 1/1 | 2/1  | 1/1 |
| 16         | 61026305                   | 80.90               |           |                        |                                |     |      |     |
| 20         | 161423                     | 0.68                |           |                        |                                |     |      |     |
| 20         |                            |                     | D20S117   | 2.83                   | 2/1                            | 1/1 | 1/1  | 2/1 |
| 20         |                            |                     | D20S889   | 11.20                  | 2/2                            | 2/2 | 2/2  | 3/1 |
| 20         |                            |                     | D20S194   | 18.26                  | 1/1                            | 1/1 | 1/1  | 1/1 |
| 20         | 7223683                    | 19.09               |           |                        |                                |     |      |     |

\*Candidate regions are shaded
